# Supplementary material for: The knowledge, attitudes and practices of hand, foot, and mouth disease prevention strategies amongst parents and educators of children under 5 years amidst COVID-19 pandemic: A cross-sectional study
Source: Front Public Health. 2022 Oct 17;10:908004. doi: 10.3389/fpubh.2022.908004 (PMC9619192; doi:10.3389/fpubh.2022.908004)
Supplement: Supplementary file 1 [file Table_1.XLSX]

## Sheet: Overview
Questions were first matched to the following domains as shown in Table A1, and scored based on the frameworks shown in Tables A2 and A3, where question-specific scores were used to derive domain-specific scores in the Knowledge, Attitude and Practise domains.
Table A1. Questions belonging to each domain, matched between parents and teachers
Knowledge Domain		Attitude Domain		Practise Domain		Experience Domain
Parents	Teachers	Parents	Teachers	Parents	Teachers	Parents	Teachers
1	1	15	8	7	7	NIL	19
2	2	16ˠ	10ˠ	8	9		22
3	3	17	13	9*	11*		23
4*	4*	18	14	10			24
5	5	19aˠ	21ˠ	11*	12*		25
6	6	19b		12			26
		20		13
		21	27	14
*Questions are same but options provided are slightly different, hence marking scheme slightly different (can present the descriptive comparison for options chosen but score will be omitted for matched domain total)
ˠ Questions are the same but scoring slightly different due to response choice type (multiple vs single)

## Sheet: Table A2_Parents (P)
Table A2. Scoring Framework for Parents
Knowledge	Question	Choice type	No of "positive" responses	"Positive" response	Min. Marks	Max. Marks	Marks allocation	General marking scheme for section
	1	Single	1	virus	-1	1	1 mark for correct answer -1 mark for other answers	1. Correct Answer (Multiple choice): cumulative marking to 1 mark max. 2. Correct Answer (Single choice): 1 mark 3. All Wrong answers/'I don't know': -1 mark 4. Blank/not answered: 0 mark Overall: sum up marks over all questions in section
	2	Multiple	4	saliva; stool; fluid;respiratory droplets	-1	1	1/4 mark per correct response -1 mark so long e./f. are selected, regardless of correct response selected
	3	Multiple	5	All except I don’t know	-1	1	1/5 mark per correct response -1 mark so long f. is selected, regardless of correct response selected
	4	Multiple	6	All except I don’t know	-1	1	1/6 mark per correct response -1 mark so long g. is selected, regardless of correct response selected
	5	Single	1	FALSE	-1	1	1 mark for correct answer -1 mark for other answers
	6	Single	1	TRUE	-1	1	1 mark for correct answer -1 mark for other answers
Attitude	Question	Choice type	No of "positive" responses	"Positive" response	Min. Marks	Max. Marks	Marks allocation	General marking scheme for section
	15	Multiple	2	important; protective against infectious disease	-1	1	1 mark for "positive response" -1 mark for other answers (except Others) For "Others", 1 mark for "postive" response, 0 mark for responses not directly stating attitude, -1 mark for response directly stating attitude but were not "positive" (e.g. damaging to hands) Overall marks: sum then average out summed score over no. of positive options i.e. 3 for question total score (round question score t…	For each question 1 mark for positive response -1 mark for not "positive" response 0 mark for responses not directly answering question -> sum for overall question score For questions which can have multiple responses, overall marks for the question willl be calculated by: sum then average out summed score over no. of positive options i.e. 3 for question total score (round question score to 2 dp)…
	16	Multiple	2	important; protective against infectious disease	-1	1	1 mark for "positive response" -1 mark for other answers (except Others) For "Others", 1 mark for "postive" response (e.g. impt, esp if the child is sick or toys are shared), 0 mark for responses not directly stating attitude, -1 mark for response directly stating attitude but were not "positive" (e.g. energy/time consuming, unnecessary) Overall marks: sum then average out summed score over no. o…
	17	Multiple	2	important; protective against infectious disease	-1	1	1 mark for "positive response" -1 mark for other answers (except Others) For "Others", 1 mark for "postive" response, 0 mark for responses not directly stating attitude, -1 mark for response directly stating attitude but were not "positive" Overall marks: sum then average out summed score over no. of positive options i.e. 3 for question total score (round question score to 2 dp) and that for the …
	18	Multiple	2	important; protective against infectious disease	-1	1	1 mark for "positive response" -1 mark for other answers (except Others) For "Others", 1 mark for "postive" response (e.g. impt if there are visitors), 0 mark for responses not directly stating attitude, -1 mark for response directly stating attitude but were not "positive" (e.g. unnecessary) Overall marks: sum then average out summed score over no. of positive options i.e. 3 for question total s…
	19a	Mutiple	1	reasonable; "too short"	-1	1	1 mark for "positive response" -1 mark for "too long" Overall marks: sum then average out summed score over no. of positive options i.e. 2 for question total score (round question score to 2 dp) and that for the negative options i.e. -1 (normalise to -1) -> then just sum the 2 scores (i.e. that for positive and negative responses) to see the overall score which will tell us the overall direction …
	19b	Multiple	1	can help to stop the spread of HFMD; poses inconvenience to me, but I will be able to make the appropriate arrangments to cope	-1	1	1 mark for either "positive response": can help stop spread of HFMD, poses inconvenience but can make appropriate arrangements 0 mark for neutral response: - -1 mark for not "positive response": is not necessary, will be too much of a burden to me For "Others", 1 mark for "postive" response (e.g. necessary), 0 mark for responses not directly stating attitude, -1 mark for response directly stating…
	20	Single	2	Yes; Depends	-1	1	1 mark for either "positive response": Yes, Depends -1 mark for not "positive response": No
	21	Single	1	Yes	-1	1	1 mark for "positive response": Yes -1 mark for not "positive response": No
Practices	Question	Choice type	No of "positive" responses	"Positive" response	Min. Marks	Max. Marks	Marks allocation	General marking scheme for section
	7	Single	1	Always	-1	1	1 mark for "best" practice: Always 0.5 mark for "good" practice: Sometimes, when prompted by guide -1 mark for "poor" practice: Never	For questions that can have multiple responses: Additive marking (1 mark/practice) for questions where cumulative practices have incremental benefit, but normalised to 1 for overall question score - Overall marks for the question willl be calculated by: sum then average out summed score over no. of positive options i.e. 3 for question total score (round question score to 2 dp) and that for the ne…
	8	Single	1	Always	-1	1	1 mark for "best" practice: Always 0.5 mark for "good" practice: Sometimes, when prompted by guide -1 mark for "poor" practice: Never
	9	Single	1	Everyday	-1	1	6 marks for: everyday 5 mark for: 3-5 times a week 4 mark for: once a week, 3 marks for: once every 2 weeks 2 marks for: once a month 1 mark for: Less than once a month -1 mark for: Never Normalise the positive marks to 1 I.e. divide by 6 so as to allow for equal weightage of the question to the entire domain		1 mark per option, increasing marks for increasing frequency, with Never as -1, then the rest from 1-6, 6 for "everyday" and 1 for "<once a month"-> normalise this to like allow for equal weightage of each qns to the overall domain score
	10	Single	2	Before and after play time; only after play time	-1	1	1 marks for "best" practice: before and after play time 0.5 mark for "good" practice : only before play time, only after play time -1 mark for "poor" practice: Never For Others: 0 mark for frequency-based answer (time-related, since already awards for such an answer in Q9, so take it as not answering question) 0.5 mark for occasion-based answer (e.g. just bought/when new, before giving toy to chi…		to exclude from overall scoring, since it’s a context-based question and doesn’t add value to the purpose of identifying the barriers/motivators
	11	Multiple	3	Cleaned with detergent (soap); cleaned with warm water and detergent (soap); cleaned with household cleach	-1	1	1 mark for each "best" practice: cleaned with detergent (Soap), cleaned with warm water and detergent (soap), cleaned with hosuehold bleach, others (disinfectant/sanitizer/alcohol) 0 mark for each "poor" practice: Dry wipe, wipe with wet cloth, Others (water/others) (considered poor practice cause it does not remove the microbes effectively) -1 mark for each "worse than poor" practice: Never Over…
	12	Single	3	Cleaned with detergent (soap); cleaned with warm water and detergent (soap); cleaned with household cleach	-1	1	1 mark for each "best" practice: cleaned with detergent (Soap), cleaned with warm water and detergent (soap), cleaned with hosuehold bleach, others (disinfectant/sanitizer/home mixture) 0 mark for each "poor" practice: Dry wipe, wipe with wet cloth, Others (steam) (considered poor practice cause it does not remove the microbes effectively, ) -1 mark for each "worse than poor" practice: Never Over…
	13	Single	2	Everyday; when someone in the household is sick	-1	1	5 marks for: everyday, when someone in the household is sick 4 marks for: 3-5 times a week 3 marks for: 1-2 times a week 2 marks for: once every other week 1 mark for: once a month -1 mark for "poor" practice: Never For Others: - Report use in Toilet only: with frequency of use reported -> consider same as above; without frequency of use reported -> consider not answering question (0 marks) - Rep…		logic for decimal points is to normalise the maximum mark as 1
	14	Multiple	3	Inform CCC immediately; keep them at home until all symptoms disappear, even if it is shorter than MC duration; keep them at home until all symptoms disappear, even if it is longer than MC duration	-1	1	1 mark for either "best" practice: Keep them at home until all symptoms disappear, even if it is shorter or longer than the MC duration 0.5 mark for "good" practice: Inform CCC immediately, Keep them at home until MC expires (logic: assume doctor will give an approx 10-day MC) -1 mark each for "poor" practice: Bring them back to CCC once they feel better, even with persisting symptoms Overall mar…

## Sheet: Table A3Teachers (T)
Table A3. Scoring Framework for Teachers
Knowledge	Question	Choice type	No of "positive" responses	"Positive" response	Min. Marks	Max. Marks	Marks allocation	General marking scheme for section	Comments
	Domain: Knowledge
	1	Single	1	virus	-1	1	1 mark for correct answer -1 mark for other answers	1. Correct Answer (Multiple choice): cumulative marking to 1 mark max. 2. Correct Answer (Single choice): 1 mark 3. All Wrong answers/'I don't know': -1 mark 4. Blank/not answered: 0 mark Overall: sum up marks over all questions in section	so knowledge section is okay
	2	Multiple	4	saliva; stool; fluid;respiratory droplets	-1	1	1/4 mark per correct response -1 mark so long e./f. are selected, regardless of correct response selected		to explain the rationale of the negative marking:
	3	Multiple	5	All except I don’t know	-1	1	1/5 mark per correct response -1 mark so long f. is selected, regardless of correct response selected
	4	Multiple	6	All except I don’t know	-1	1	1/6 mark per correct response -1 mark so long g. is selected, regardless of correct response selected
	5	Single	1	FALSE	-1	1	1 mark for correct answer -1 mark for other answers
	6	Single	1	TRUE	-1	1	1 mark for correct answer -1 mark for other answers
Attitude	Question	Choice type	No of "positive" responses	"Positive" response	Min. Marks	Max. Marks	Marks allocation	General marking scheme for section
	Domain: Attitude
	8	Multiple	2	important; protective against infectious disease; others (important)	-1	1	1 mark for "positive response" -1 mark for other answers (except Others) For "Others", 1 mark for "postive" response, 0 mark for responses not directly stating attitude, -1 mark for response directly stating attitude but were not "positive" Overall marks: sum then average out summed score over no. of positive options i.e. 3 for question total score (round question score to 2 dp) and that for the …	For each question 1 mark for positive response -1 mark for not "positive" response 0 mark for responses not directly answering question -> sum for overall question score For questions which can have multiple responses, overall marks for the question willl be calculated by: sum then average out summed score over no. of positive options i.e. 3 for question total score (round question score to 2 dp)…	need to explain the concept and rationale for 0 mark in methods writeup; like what do we mean by NAQ
	10	Single	2	important; protective against infectious disease	-1	1	1 mark for "positive response" -1 mark for other answers (except Others) For "Others", 1 mark for "postive" response, 0 mark for responses not directly stating attitude, -1 mark for response directly stating attitude but were not "positive" Overall marks: sum then average out summed score over no. of positive options i.e. 3 for question total score (round question score to 2 dp) and that for the …
	13	Multiple	2	important; protective against infectious disease	-1	1	1 mark for "positive response" -1 mark for other answers (except Others) For "Others", 1 mark for "postive" response, 0 mark for responses not directly stating attitude, -1 mark for response directly stating attitude but were not "positive" Overall marks: sum then average out summed score over no. of positive options i.e. 3 for question total score (round question score to 2 dp) and that for the …
	14	Multiple	2	important; protective against infectious disease	-1	1	1 mark for "positive response" -1 mark for other answers (except Others) For "Others", 1 mark for "postive" response, 0 mark for responses not directly stating attitude, -1 mark for response directly stating attitude but were not "positive" Overall marks: sum then average out summed score over no. of positive options i.e. 3 for question total score (round question score to 2 dp) and that for the …
	21	Single	2	reasonable; too short	-1	1	1 mark for "positive response" -1 mark for "too long"		incubation period is 14 days, then official period for outbreak to be over is 2x incubation period = 28 days; but anw we trying to assess if 10 days under MOH guideline is reasonable or not, so should not mark down those who think it is reasonable although 10 days is actually insufficient
	27	Single	1	Yes	-1	1	1 mark for "positive response" -1 mark for other answers
Practices	Question	Choice type	No of "positive" responses	"Positive" response	Min. Marks	Max. Marks	Marks allocation	General marking scheme for section
	Domain: Practise
	7	Single	1	Always	-1	1	1 mark for "best" practice: Always 0.5 mark for "good" practice: Sometimes, when prompted by guide -1 mark for "poor" practice: Never	For questions that can have multiple responses: Additive marking (1 mark/practice) for questions where cumulative practices have incremental benefit, but normalised to 1 for overall question score - Overall marks for the question willl be calculated by: sum then average out summed score over no. of positive options i.e. 3 for question total score (round question score to 2 dp) and that for the ne…
	9	Single	1	Always	-1	1	1 mark for "best" practice: Always 0.5 mark for "good" practice: Sometimes, when prompted by guide -1 mark for "poor" practice: Never
	11	Single	2	more than once a day; once a day	-1	1	1 mark for "best" practice: More than once a day, once a day, Others (everyday/daily/after play) 0.5 mark for "good" practice: 2-3 times a week 0 mark for "poor" practice: Once a week, Others (depends)
	12	Multiple	3	Cleaned with detergent (soap); cleaned with warm water and detergent (soap); cleaned with household cleach	0	1	1 mark each for "best" practice: cleaned with detergent (Soap), cleaned with warm water and detergent (soap), cleaned with hosuehold bleach, others (disinfectant/sanitizer) 0.5 mark for "good" practice: - 0 mark each for "poor" practice: Dry wipe, wipe with wet cloth (considered poor practice cause it does not remove the microbes effectively) 0 mark for others (not disinfectant/sanitiser) Overall…
	15	Single	1	No	0	1	1 mark for "positive response" (No) 0 mark for other answers (Yes)
	15 (Yes)	Multiple	2	educate parents and deny entry; seek medical endorsement that child is well to return to centre	-1	1	1 mark for each "best" practice: educate and explain to parents, request for doctor endorsement for medically fit 0.5 mark for "good" practice: - -1 mark for "poor" practice: Allow child to enter the centre, seek principal for approval 0 mark for Others (Logic is that either option for best practices is equally good, & to give same score as the positive response in Q15) Overall marks: sum then av…
	16	Free response	NA				-
	17	Single	1	Yes	-1	1	1 mark for "positive response" (Yes) -1 mark for other answers (No)
	17 (Yes)	Multiple	2 +1 (including positive responses under Others)	Temperature check; check for	0		1 mark each for "best" practice: Temperature check, check for unusual rashes etc, others (check for relevant RTI symptoms (explicitly stated)/personal hygiene (sanitise or wash hands)) 0 mark for Other irrelevant checks e.g. bruises Overall marks: sum then average summed score over no. of options i.e. 3 for question total score (round up final score to 2 dp)
	18	Single	1	They are sent home; seek doctor advice	-1	1	1 mark for "best" practices: sent home, others (seek doctor advice) -1 mark for "poor" practice: allowed to enter centre but monitored closely 0 mark for Others (others)		still mark down the practice since we are going from the public health POV, but highlight this might be due to operational workflow and needs in these discussion if it is a major trend observed
	20	Multiple	2	Isolate child; call to inform parents to pick up their child	-1	1	1 mark each for "best" practice: Isolate child at sick bay or a separate classroom, call to inform parents & pick up their child, Others (child is isolated and monitored until pick up) 0.5 mark for "good" practice: Others (Monitor other children) -1 mark each for "poor" practice: Others (Monitor child only, unclear if child is isolated) Overall marks: sum then average out summed score over no. of…
